# Supplementary material for: 3D printable SiO2 nanoparticle ink for patient specific bone regeneration
Source: PubMed Central journal article supplement (PMC9069463; doi:10.1039/c9ra03641e), 2019-07-31
Supplement: RA-009-C9RA03641E-s001.pdf [file RA-009-C9RA03641E-s001.pdf]

### Supplementary Information

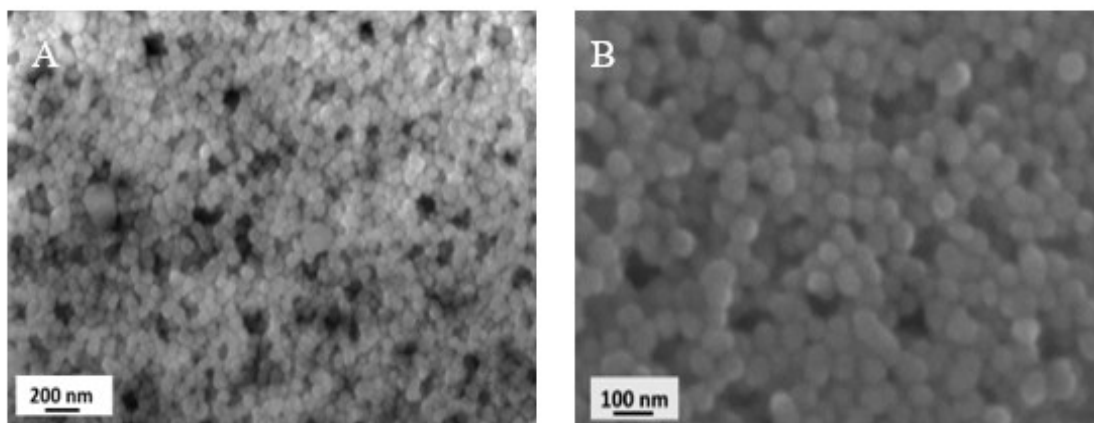

**Supplementary Information 1.** SEM image of prepared SiO<sub>2</sub> nanoparticle at scale 200 μm (A). SEM image of at SiO<sub>2</sub> nanoparticle at scale bar 100 μm (B)

With respect to the above SEM image, average particle size of the SiO<sub>2</sub> nanoparticle is 64 nm (calculated from image J software).

Radius of SiO<sub>2</sub> particle,  $r_{\text{silica}} = 32 \text{ nm}$ .

Density of SiO<sub>2</sub>,  $\rho_{\text{silica}} = 2.05 \text{ g/cm}^3$ .

Volume of single SiO<sub>2</sub> particle,  $V_{\text{silica}} = \frac{4\pi r_{\text{silica}}^3}{3} = 1.37 \times 10^{-16} \text{ cm}^3$ .

Weight of a single SiO<sub>2</sub> particle,  $W_{\text{silica}} = \rho_{\text{silica}} \times V_{\text{silica}} = 2.80 \times 10^{-16} \text{ g}$ .

No. of SiO<sub>2</sub> particles per gram,  $N = 1/W_{\text{silica}} = 3.57 \times 10^{15}$  particles per gram.

Hence, Group A has 0 SiO<sub>2</sub> particles, Group B has  $8.92 \times 10^{15}$  particles and Group C has  $17.85 \times 10^{15}$  particles.

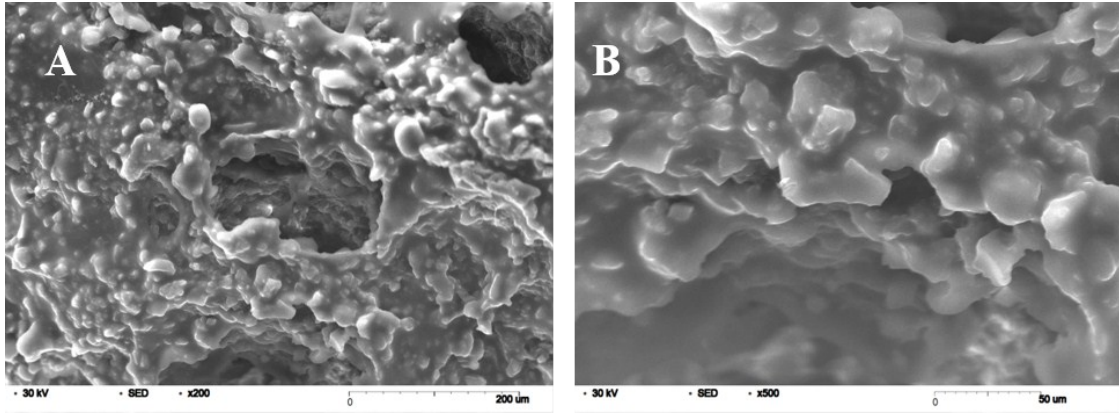

**Supplementary Information 2.** SEM image of lyophilized scaffold with 7.5wt % of SiO<sub>2</sub> nanoparticle at lower magnification with scale 200μm (A). SEM image of lyophilized scaffold with 7.5wt % of SiO<sub>2</sub> nanoparticle at higher magnification with scale bar 50μm (B).
